# Supplementary material for: Views of general practitioners on the role of CA125 in primary care to diagnose ovarian cancer
Source: PubMed Central journal article supplement (PMC3644283; doi:10.1186/1472-6874-13-8), 2013-02-19
Supplement: 1472-6874-13-8-S1.pdf [file 1472-6874-13-8-S1.pdf]

Please tick the box that applies most closely for each question:

**1. What stage of training are you at?**

- Medical student
- Foundation Year 1/2
- GP in training
- Qualified GP 0-5 years
- Qualified GP 6-10 years
- Qualified GP >10 years

**2. How would you describe the practice area in which you spend most of your clinical time?**

- Rural
- Suburban
- Urban
- Mixed

**3. How would you describe the deprivation or affluence in the area in which you spend most of your clinical time?**

- Affluent
- Average
- Deprived

**4. Are you male or female?**

- Male
- Female

**5. Over the past 2 years how many patients with ovarian cancer have you seen in primary care?**

- 0
- 1
- 2-4
- 5-10
- >10

**6. Over the past 2 years how many cases of primary ovarian cancer have you personally diagnosed or made the initial referral to secondary care?**

- 0
- 1
- 2
- 3
- 4
- >4

**7. Did you perform a CA125 to help with the diagnosis?**

- Yes every time
- Yes some of the time
- No
- Don't know
- Not applicable

**8. Are you aware of the NICE guidance on Ovarian Cancer published in April 2011?**

- Yes
- No

**9. Have you personally read the NICE guidance on Ovarian Cancer published in April 2011?**

- Yes
- No

**10. Do you anticipate that your CA125 use will increase following the publication of the NICE guidelines?**

- Yes
- No
- Don't know

The following are a series of questions asking for your views of the role of CA125 in primary care.

For the following questions please tick all that apply:

### 11. What symptoms would make you consider ovarian cancer as a possible diagnosis?

|                                               | Yes definitely        | Probably              | Possibly              | Very unlikely         | No                    |
|-----------------------------------------------|-----------------------|-----------------------|-----------------------|-----------------------|-----------------------|
| Abdominal pain                                | <input type="radio"/> | <input type="radio"/> | <input type="radio"/> | <input type="radio"/> | <input type="radio"/> |
| Bloating (<50 years)                          | <input type="radio"/> | <input type="radio"/> | <input type="radio"/> | <input type="radio"/> | <input type="radio"/> |
| Bloating (>50years)                           | <input type="radio"/> | <input type="radio"/> | <input type="radio"/> | <input type="radio"/> | <input type="radio"/> |
| Abdominal distension (intermittent)           | <input type="radio"/> | <input type="radio"/> | <input type="radio"/> | <input type="radio"/> | <input type="radio"/> |
| Abdominal distension (persistent)             | <input type="radio"/> | <input type="radio"/> | <input type="radio"/> | <input type="radio"/> | <input type="radio"/> |
| Adominal mass/swelling                        | <input type="radio"/> | <input type="radio"/> | <input type="radio"/> | <input type="radio"/> | <input type="radio"/> |
| Pelvic mass/swelling                          | <input type="radio"/> | <input type="radio"/> | <input type="radio"/> | <input type="radio"/> | <input type="radio"/> |
| Urinary frequency/urgency                     | <input type="radio"/> | <input type="radio"/> | <input type="radio"/> | <input type="radio"/> | <input type="radio"/> |
| Abnormal vaginal bleeding (pre/perimenopause) | <input type="radio"/> | <input type="radio"/> | <input type="radio"/> | <input type="radio"/> | <input type="radio"/> |
| Postmenopausal bleeding                       | <input type="radio"/> | <input type="radio"/> | <input type="radio"/> | <input type="radio"/> | <input type="radio"/> |
| Rectal bleeding                               | <input type="radio"/> | <input type="radio"/> | <input type="radio"/> | <input type="radio"/> | <input type="radio"/> |
| Loss of appetite                              | <input type="radio"/> | <input type="radio"/> | <input type="radio"/> | <input type="radio"/> | <input type="radio"/> |
| Unexplained weight loss                       | <input type="radio"/> | <input type="radio"/> | <input type="radio"/> | <input type="radio"/> | <input type="radio"/> |

### 12. Are there any other symptoms you particularly associate with ovarian cancer?

### 13. What additional factors would make you consider ovarian cancer to be more likely?

|                                        | Yes definitely        | Probably              | Possibly              | Very unlikely         | No                    |
|----------------------------------------|-----------------------|-----------------------|-----------------------|-----------------------|-----------------------|
| Postmenopausal                         | <input type="radio"/> | <input type="radio"/> | <input type="radio"/> | <input type="radio"/> | <input type="radio"/> |
| History of early menopause             | <input type="radio"/> | <input type="radio"/> | <input type="radio"/> | <input type="radio"/> | <input type="radio"/> |
| History of endometriosis               | <input type="radio"/> | <input type="radio"/> | <input type="radio"/> | <input type="radio"/> | <input type="radio"/> |
| History of infertility                 | <input type="radio"/> | <input type="radio"/> | <input type="radio"/> | <input type="radio"/> | <input type="radio"/> |
| Nulliparity                            | <input type="radio"/> | <input type="radio"/> | <input type="radio"/> | <input type="radio"/> | <input type="radio"/> |
| Multiparity                            | <input type="radio"/> | <input type="radio"/> | <input type="radio"/> | <input type="radio"/> | <input type="radio"/> |
| Family history of ovarian cancer       | <input type="radio"/> | <input type="radio"/> | <input type="radio"/> | <input type="radio"/> | <input type="radio"/> |
| Personal history of breast cancer      | <input type="radio"/> | <input type="radio"/> | <input type="radio"/> | <input type="radio"/> | <input type="radio"/> |
| Family history of breast cancer        | <input type="radio"/> | <input type="radio"/> | <input type="radio"/> | <input type="radio"/> | <input type="radio"/> |
| Obesity (BMI>40)                       | <input type="radio"/> | <input type="radio"/> | <input type="radio"/> | <input type="radio"/> | <input type="radio"/> |
| Hormone replacement therapy use        | <input type="radio"/> | <input type="radio"/> | <input type="radio"/> | <input type="radio"/> | <input type="radio"/> |
| Previous hormonal contraception use    | <input type="radio"/> | <input type="radio"/> | <input type="radio"/> | <input type="radio"/> | <input type="radio"/> |
| No previous hormonal contraception use | <input type="radio"/> | <input type="radio"/> | <input type="radio"/> | <input type="radio"/> | <input type="radio"/> |

### 14. What symptoms would prompt you to request a CA125?

|                                               | Yes definitely        | Probably              | Possibly              | Very unlikely         | No                    |
|-----------------------------------------------|-----------------------|-----------------------|-----------------------|-----------------------|-----------------------|
| Abdominal pain                                | <input type="radio"/> | <input type="radio"/> | <input type="radio"/> | <input type="radio"/> | <input type="radio"/> |
| Bloating (<50 years)                          | <input type="radio"/> | <input type="radio"/> | <input type="radio"/> | <input type="radio"/> | <input type="radio"/> |
| Bloating (>50 years)                          | <input type="radio"/> | <input type="radio"/> | <input type="radio"/> | <input type="radio"/> | <input type="radio"/> |
| Abdominal distension (intermittent)           | <input type="radio"/> | <input type="radio"/> | <input type="radio"/> | <input type="radio"/> | <input type="radio"/> |
| Abdominal distension (persistent)             | <input type="radio"/> | <input type="radio"/> | <input type="radio"/> | <input type="radio"/> | <input type="radio"/> |
| Abdominal mass/swelling                       | <input type="radio"/> | <input type="radio"/> | <input type="radio"/> | <input type="radio"/> | <input type="radio"/> |
| Urinary frequency/urgency                     | <input type="radio"/> | <input type="radio"/> | <input type="radio"/> | <input type="radio"/> | <input type="radio"/> |
| Abnormal vaginal bleeding (pre/perimenopause) | <input type="radio"/> | <input type="radio"/> | <input type="radio"/> | <input type="radio"/> | <input type="radio"/> |
| Postmenopausal bleeding                       | <input type="radio"/> | <input type="radio"/> | <input type="radio"/> | <input type="radio"/> | <input type="radio"/> |
| Rectal bleeding                               | <input type="radio"/> | <input type="radio"/> | <input type="radio"/> | <input type="radio"/> | <input type="radio"/> |
| Loss of appetite                              | <input type="radio"/> | <input type="radio"/> | <input type="radio"/> | <input type="radio"/> | <input type="radio"/> |
| Unexplained weight loss                       | <input type="radio"/> | <input type="radio"/> | <input type="radio"/> | <input type="radio"/> | <input type="radio"/> |

**15. If you suspected ovarian cancer in a woman >50 years would you order any tumour markers in addition to CA125?**

|         | Yes                   | No                    | Don't know            | Never heard of it     |
|---------|-----------------------|-----------------------|-----------------------|-----------------------|
| CEA     | <input type="radio"/> | <input type="radio"/> | <input type="radio"/> | <input type="radio"/> |
| CA19.9  | <input type="radio"/> | <input type="radio"/> | <input type="radio"/> | <input type="radio"/> |
| CA15.3  | <input type="radio"/> | <input type="radio"/> | <input type="radio"/> | <input type="radio"/> |
| HCG     | <input type="radio"/> | <input type="radio"/> | <input type="radio"/> | <input type="radio"/> |
| AFP     | <input type="radio"/> | <input type="radio"/> | <input type="radio"/> | <input type="radio"/> |
| Inhibin | <input type="radio"/> | <input type="radio"/> | <input type="radio"/> | <input type="radio"/> |
| HE4     | <input type="radio"/> | <input type="radio"/> | <input type="radio"/> | <input type="radio"/> |

**16. If the woman was under the age of 40 years would you order any tumour markers in addition to CA125?**

|         | Yes                   | No                    | Don't know            | Never heard of it     |
|---------|-----------------------|-----------------------|-----------------------|-----------------------|
| CEA     | <input type="radio"/> | <input type="radio"/> | <input type="radio"/> | <input type="radio"/> |
| CA19.9  | <input type="radio"/> | <input type="radio"/> | <input type="radio"/> | <input type="radio"/> |
| CA15.3  | <input type="radio"/> | <input type="radio"/> | <input type="radio"/> | <input type="radio"/> |
| HCG     | <input type="radio"/> | <input type="radio"/> | <input type="radio"/> | <input type="radio"/> |
| AFP     | <input type="radio"/> | <input type="radio"/> | <input type="radio"/> | <input type="radio"/> |
| Inhibin | <input type="radio"/> | <input type="radio"/> | <input type="radio"/> | <input type="radio"/> |
| HE4     | <input type="radio"/> | <input type="radio"/> | <input type="radio"/> | <input type="radio"/> |

**17. Would you perform a speculum/vaginal examination on a patient you were referring to secondary care for suspected ovarian cancer?**

- Every case
- Most cases
- Rarely
- Never

**18. If a patient had a raised CA125 and an ovarian cyst on ultrasound scan would you inform them that they had a high risk of having ovarian cancer? (assuming the normal range locally is <35iunits).**

|                       | Yes definitely        | Yes                   | Maybe                 | Very unlikely         | No                    |
|-----------------------|-----------------------|-----------------------|-----------------------|-----------------------|-----------------------|
| If CA125 was <35      | <input type="radio"/> | <input type="radio"/> | <input type="radio"/> | <input type="radio"/> | <input type="radio"/> |
| If CA125 was 35-50    | <input type="radio"/> | <input type="radio"/> | <input type="radio"/> | <input type="radio"/> | <input type="radio"/> |
| If CA125 was 51-100   | <input type="radio"/> | <input type="radio"/> | <input type="radio"/> | <input type="radio"/> | <input type="radio"/> |
| If CA125 was 101-500  | <input type="radio"/> | <input type="radio"/> | <input type="radio"/> | <input type="radio"/> | <input type="radio"/> |
| If CA125 was 501-1000 | <input type="radio"/> | <input type="radio"/> | <input type="radio"/> | <input type="radio"/> | <input type="radio"/> |
| If CA125 was >1000    | <input type="radio"/> | <input type="radio"/> | <input type="radio"/> | <input type="radio"/> | <input type="radio"/> |

For the following case scenarios please select the letter corresponding to the management option that you think most closely fits what you would chose to do first:

- a) Refer to gynae oncology directly
- b) Refer to general gynaecology
- c) Refer under 2 week wait guidelines to gynaecology
- d) Refer to another hospital specialist
- e) Do other blood tests
- f) Order a pelvic ultrasound
- g) Watch and wait

**19. A premenopausal woman (<50 years) with no family history of ovarian cancer presents with persistent abdominal bloating for the past 1 month. What would you do:**

|                                                                                                            | a                     | b                     | c                     | d                     | e                     | f                     | g                     |
|------------------------------------------------------------------------------------------------------------|-----------------------|-----------------------|-----------------------|-----------------------|-----------------------|-----------------------|-----------------------|
| If her CA125 was 50                                                                                        | <input type="radio"/> | <input type="radio"/> | <input type="radio"/> | <input type="radio"/> | <input type="radio"/> | <input type="radio"/> | <input type="radio"/> |
| If her CA125 was 200                                                                                       | <input type="radio"/> | <input type="radio"/> | <input type="radio"/> | <input type="radio"/> | <input type="radio"/> | <input type="radio"/> | <input type="radio"/> |
| If her CA125 was 50 but a pelvic ultrasound scan showed no abnormality                                     | <input type="radio"/> | <input type="radio"/> | <input type="radio"/> | <input type="radio"/> | <input type="radio"/> | <input type="radio"/> | <input type="radio"/> |
| If her CA125 was 200 but a pelvic ultrasound scan showed no abnormality                                    | <input type="radio"/> | <input type="radio"/> | <input type="radio"/> | <input type="radio"/> | <input type="radio"/> | <input type="radio"/> | <input type="radio"/> |
| If her CA125 was normal and a pelvic ultrasound showed no abnormality but the abdominal bloating persisted | <input type="radio"/> | <input type="radio"/> | <input type="radio"/> | <input type="radio"/> | <input type="radio"/> | <input type="radio"/> | <input type="radio"/> |

**20. If you would take a different course of management outside the options given above please comment in the box below.**

**21. A postmenopausal woman (>50 years) with no family history of ovarian cancer presents with persistent abdominal bloating for the past 1 month. What would you do?**

|                                                                                                            | a                     | b                     | c                     | d                     | e                     | f                     | g                     |
|------------------------------------------------------------------------------------------------------------|-----------------------|-----------------------|-----------------------|-----------------------|-----------------------|-----------------------|-----------------------|
| If her CA125 was 50                                                                                        | <input type="radio"/> | <input type="radio"/> | <input type="radio"/> | <input type="radio"/> | <input type="radio"/> | <input type="radio"/> | <input type="radio"/> |
| If her CA125 was 200                                                                                       | <input type="radio"/> | <input type="radio"/> | <input type="radio"/> | <input type="radio"/> | <input type="radio"/> | <input type="radio"/> | <input type="radio"/> |
| If her CA125 was 50 but a pelvic ultrasound scan showed no abnormality                                     | <input type="radio"/> | <input type="radio"/> | <input type="radio"/> | <input type="radio"/> | <input type="radio"/> | <input type="radio"/> | <input type="radio"/> |
| If her CA125 was 200 but a pelvic ultrasound scan showed no abnormality                                    | <input type="radio"/> | <input type="radio"/> | <input type="radio"/> | <input type="radio"/> | <input type="radio"/> | <input type="radio"/> | <input type="radio"/> |
| If her CA125 was normal and a pelvic ultrasound showed no abnormality but the abdominal bloating persisted | <input type="radio"/> | <input type="radio"/> | <input type="radio"/> | <input type="radio"/> | <input type="radio"/> | <input type="radio"/> | <input type="radio"/> |

**22. If you would take a different course of management outside the options given above please comment in the box below.**

**23. Did you refer to the NICE guidance when completing this questionnaire?**

- Yes
- No

**24. Thank you for taking the time to respond to this questionnaire which will be use as the basis of further research into ovarian cancer screening in primary care.**

**If you have any comments on the role of CA125 in primary care please use the box below.**
